# Supplementary material for: Circulating miR-150 in CSF is a novel candidate biomarker for multiple sclerosis
Source: PubMed Central journal article supplement — Neurol Neuroimmunol Neuroinflamm. 2016 Apr 20;3(3):e219. doi: 10.1212/NXI.0000000000000219 (PMC4841644; doi:10.1212/nxi.0000000000000219), 2016-04-20
Supplement: supp_3.3.e219_Figure_e-2.pdf [file supp_3.3.e219_Figure_e-2.pdf]

**A** MS (n=87) vs. NINDC (n=81)

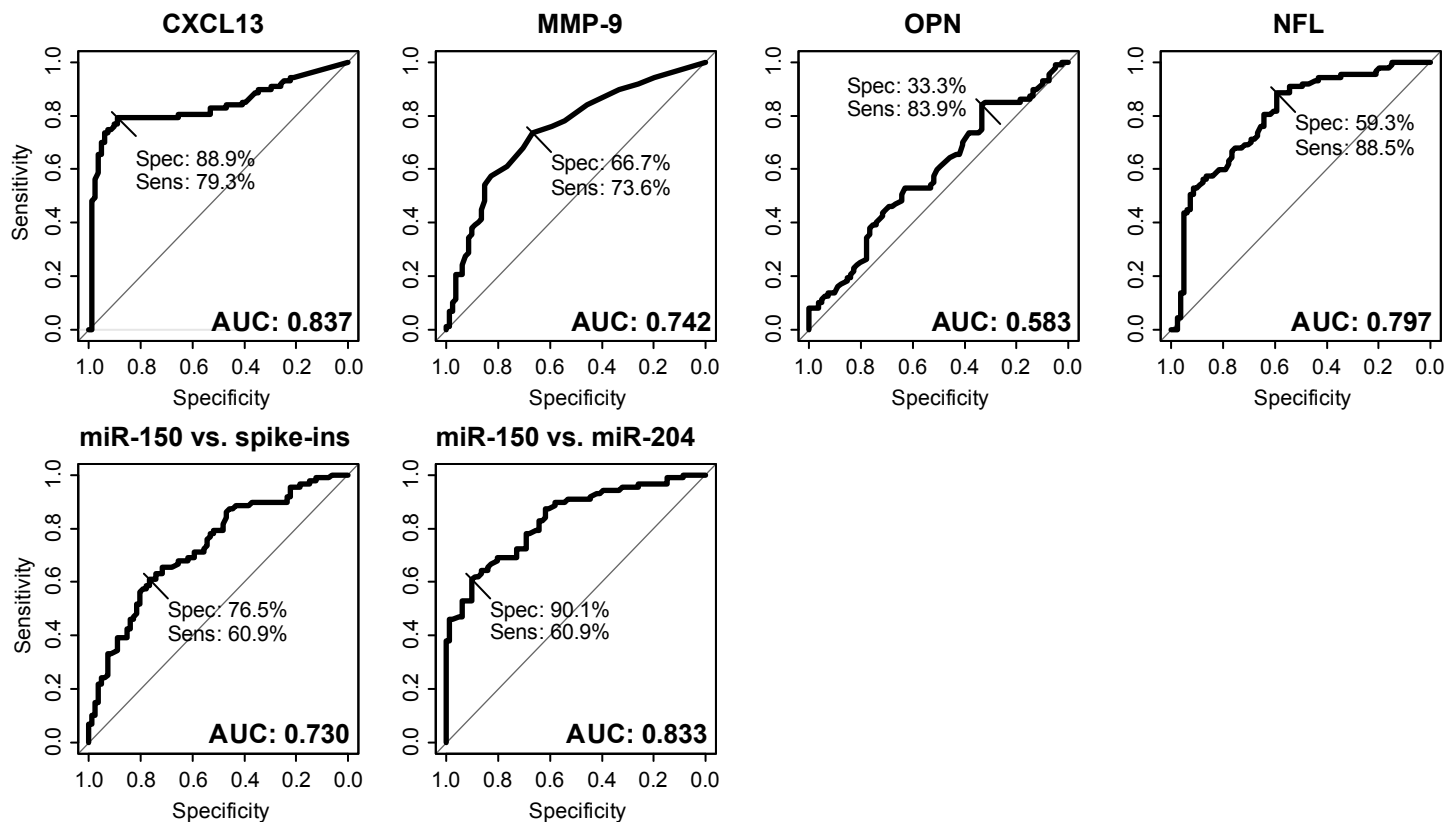

**B** CIS (n=25) vs. CIS-MS (n=33)

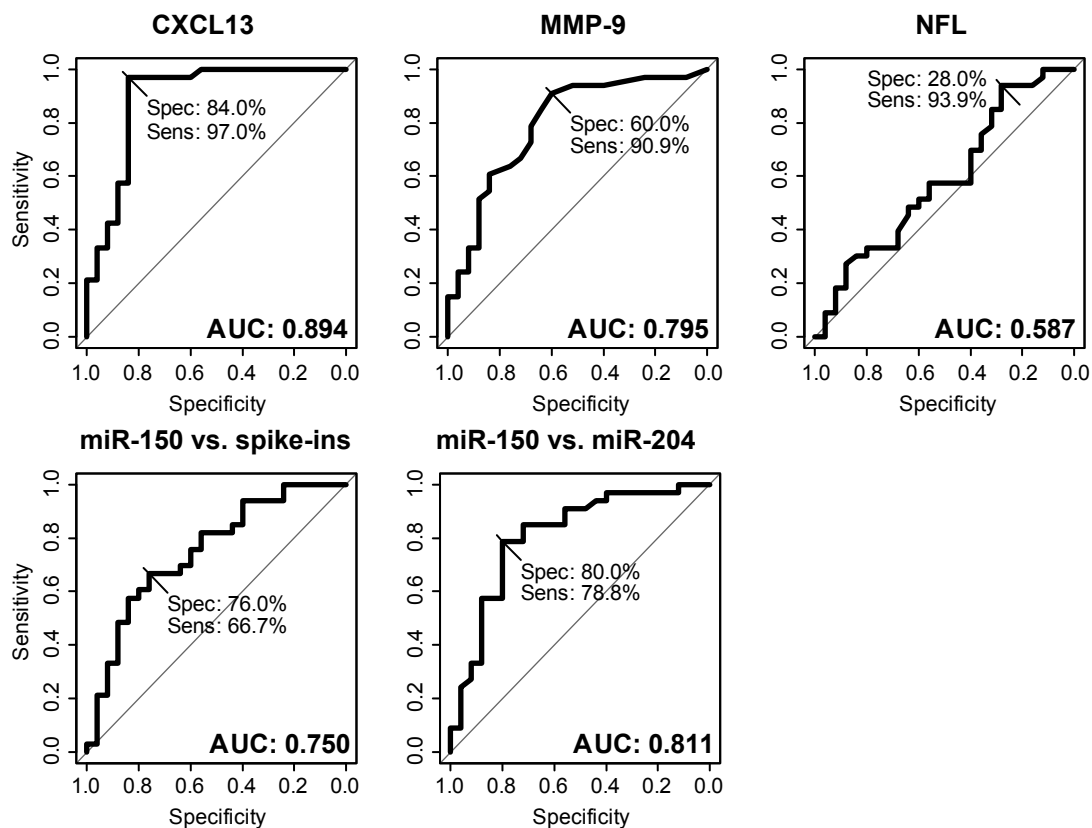

**Supplementary figure 2.** Receiver operating characteristic (ROC) curve analyses of the candidate biomarkers. ROC curve analyses between a) MS and non-inflammatory neurological disease controls (NINDCs) and b) clinically isolated syndrome (CIS) patients that converted to MS (CIS-MS) and those that never converted (CIS) were performed on a subset of individuals for which measures of all candidate biomarkers were available, CXCL13, MMP-9, OPN, NFL and miR-150. OPN measures were not available for b). NFL and NFL.adj (adjusted for age-related differences) performed equally (data not shown). AUC, area under the curve.
